# Supplementary material for: Root growth, water uptake, and sap flow of winter wheat in response to different soil water availability
Source: Copernicus journal article supplement (doi:10.5194/hess-2017-711), 2017-12-11
Supplement: Supplementary file 1 [file hess-2017-711-supplement.pdf]

## Supplementary

**Table S1.** RMSE, ME and  $d$  (see Eq. 14, 15 and 16) of the soil water content (SWC) and soil water pressure head (SWP) for the Feddes-Jarvis (FJ) and Couvreur (C) models in the three plots (P1: sheltered; P2: rainfed; P3: irrigated) of the stony (F1) and silty (F2) soils.

|    |      | SWC                          |         |         |         |         |        | SWP                |        |         |        |        |        |
|----|------|------------------------------|---------|---------|---------|---------|--------|--------------------|--------|---------|--------|--------|--------|
|    |      | P1                           |         | P2      |         | P3      |        | P1                 |        | P2      |        | P3     |        |
|    |      | FJ                           | C       | FJ      | C       | FJ      | C      | FJ                 | C      | FJ      | C      | FJ     | C      |
|    |      | $\text{cm}^3 \text{cm}^{-3}$ |         |         |         |         |        | $\log_{10}([-cm])$ |        |         |        |        |        |
| F1 | RMSE | 0.0241                       | 0.0226  | 0.0324  | 0.0301  | 0.0238  | 0.0246 | 0.7315             | 0.6740 | 0.4874  | 0.5159 | 0.3162 | 0.3131 |
|    | ME   | -0.0017                      | -0.0036 | -0.0074 | -0.0087 | -0.0019 | 0.0012 | -0.0014            | 0.0491 | 0.0607  | 0.0994 | 0.0312 | 0.0040 |
|    | $d$  | 0.9330                       | 0.9440  | 0.9121  | 0.9248  | 0.9398  | 0.9357 | 0.8453             | 0.8770 | 0.9011  | 0.8943 | 0.6530 | 0.6300 |
| F2 | RMSE | 0.0460                       | 0.0471  | 0.0490  | 0.0457  | 0.0654  | 0.0606 | 0.5451             | 0.5354 | 0.6378  | 0.6403 | 0.6656 | 0.6171 |
|    | ME   | 0.0001                       | 0.0058  | 0.0311  | 0.0261  | 0.0476  | 0.0404 | 0.1017             | 0.0262 | -0.0397 | 0.0474 | 0.0405 | 0.1712 |
|    | $d$  | 0.8502                       | 0.8479  | 0.7843  | 0.8027  | 0.6120  | 0.6329 | 0.6145             | 0.6069 | 0.7630  | 0.7078 | 0.5421 | 0.5073 |

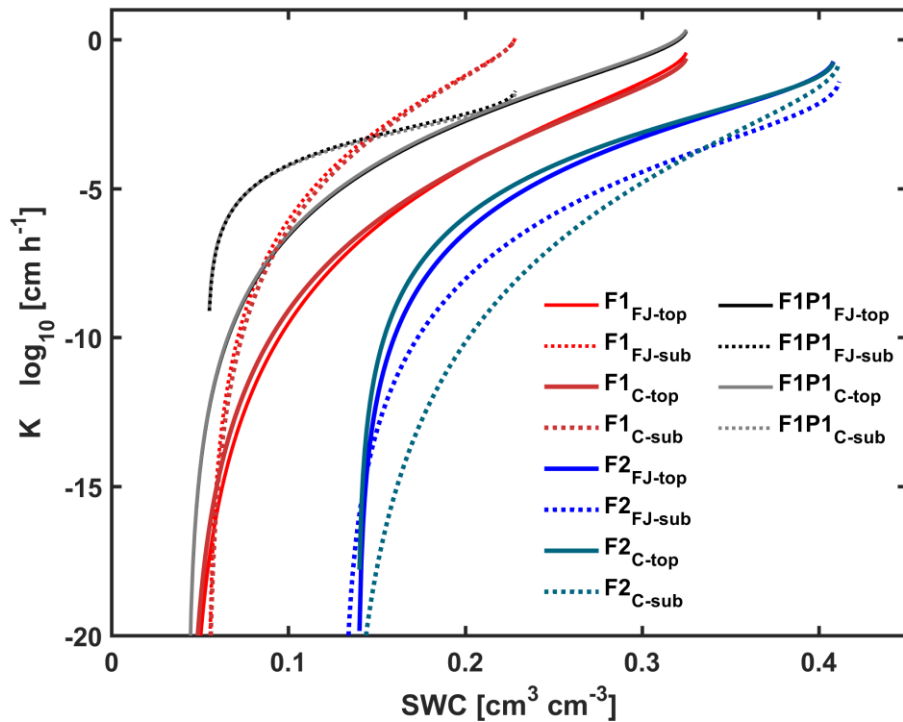

**Figure S1.** Relation between soil water content (SWC) and soil hydraulic conductivity (K) that was obtained by the Feddes-Jarvis (FJ) and Couvreur (C) models in the top- and subsoil of the stony (F1), the sheltered plot of the stony soil (F1P1), and silty (F2) soils.

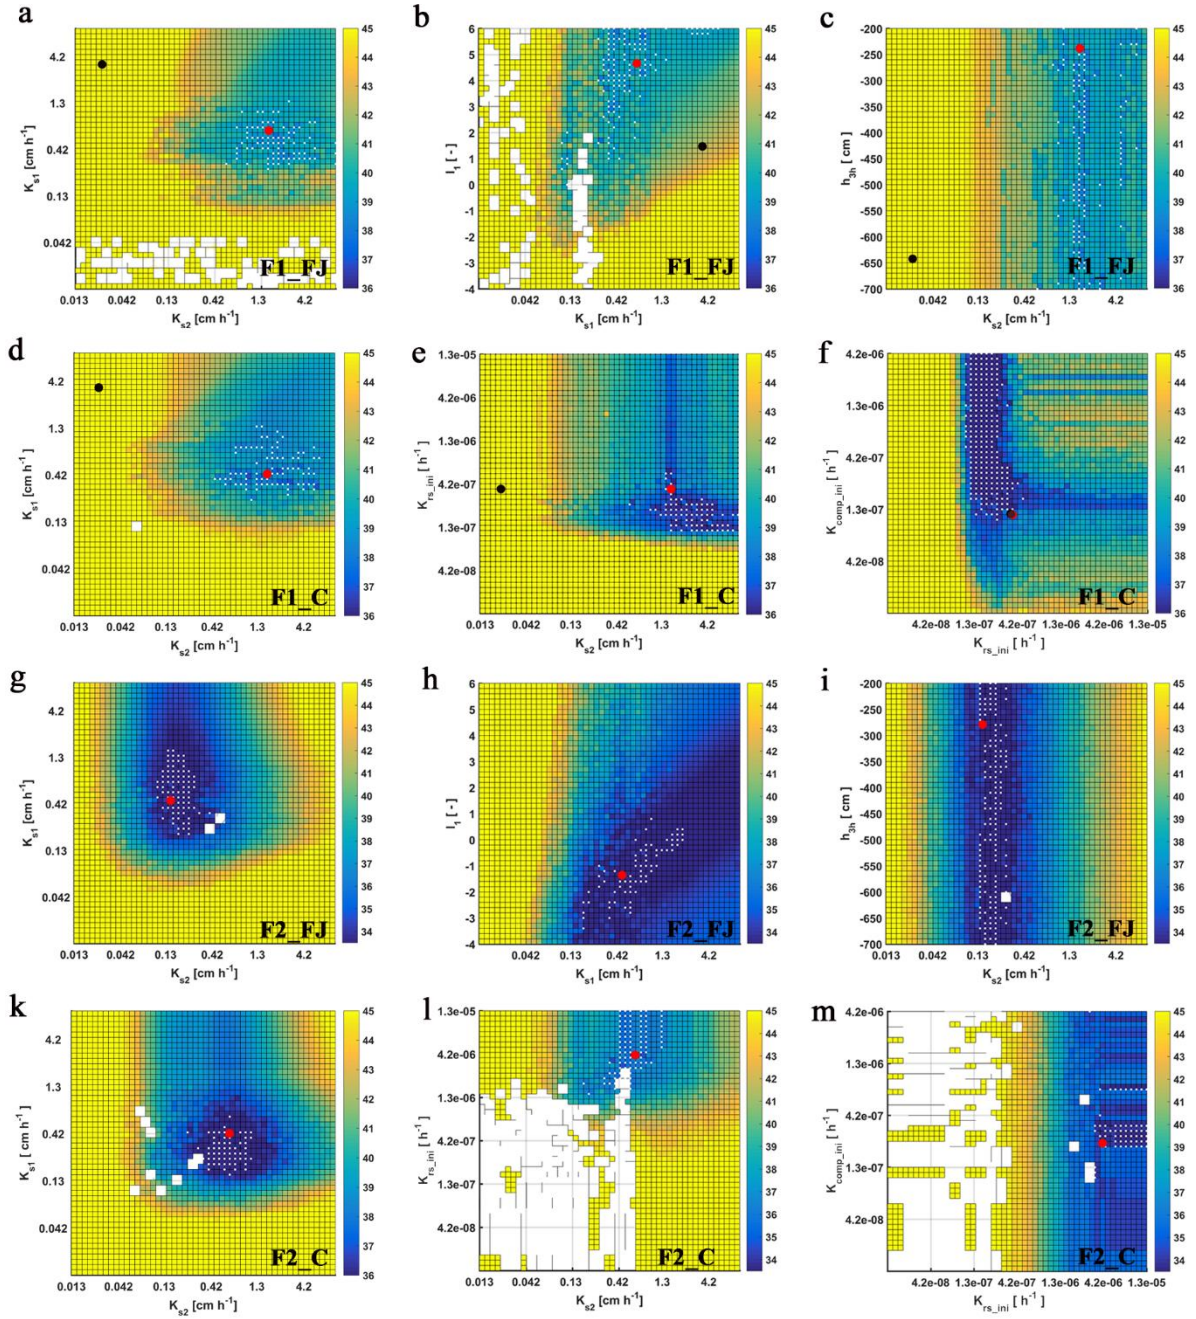

**Figure S2.** Response surface for  $K_{s2} - K_{s1}$  (FJ, Feddes-Jarvis model),  $K_{s1} - l_1$  (FJ),  $K_{s2} - h_{3h}$  (FJ),  $K_{s2} - K_{s1}$  (C, Couvreur model),  $K_{s2} - K_{rs\_ini}$  (C), and  $K_{rs\_ini} - K_{comp\_ini}$  (C) parameter planes of the stony (F1) and silty (F2) soils. Color bar: range of the objective function; white dot: area within 0.5% range of objective function (OF) minimum; red dot: optimum value obtained from the inverse modeling; black dot: optimum value obtained from the sheltered plot of the stony soil.  $K_s$ , saturated conductivity;  $l$ , empirical model parameter; 1, 2: top- and subsoil;  $K_{rs}$ , root system conductance;  $K_{comp}$ , compensatory root water uptake (RWU) conductance;  $h_{3h}$ , water potential at high transpiration.

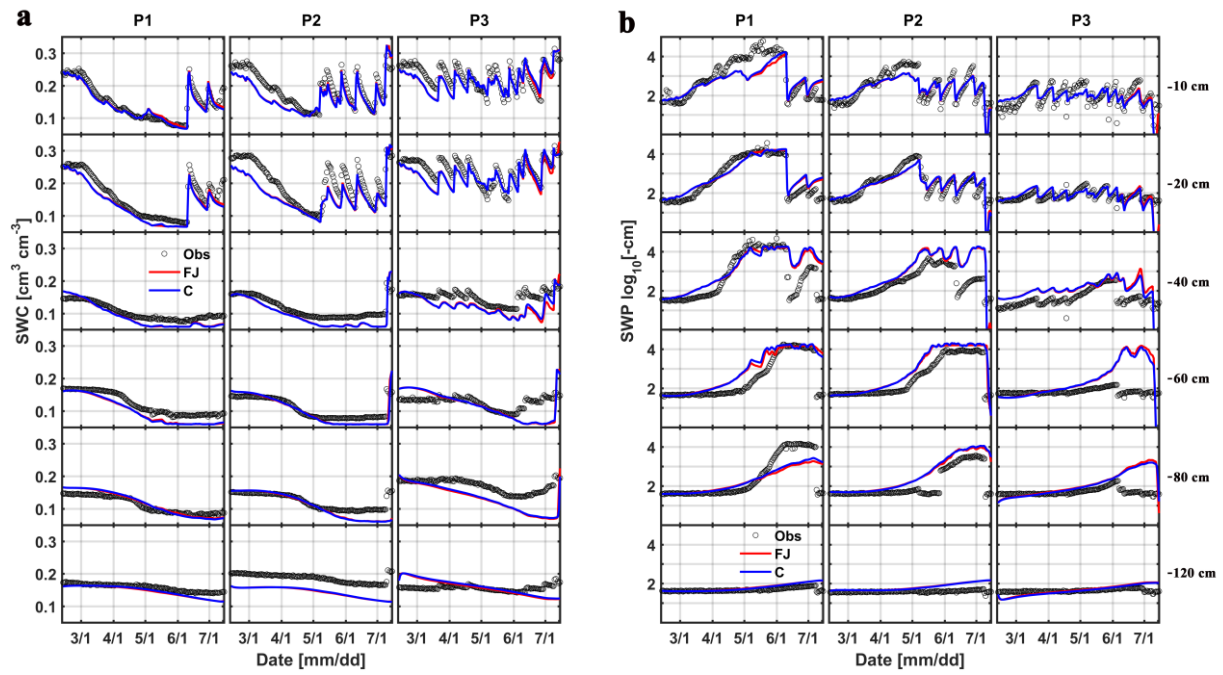

**Figure S3.** Simulated (a) soil water content (SWC) and (b) soil water pressure head (SWP) by the Feddes-Jarvis (FJ, blue) and Couvreur (C, red) models at different depths in depths in the three plots (P1: sheltered; P2: rainfed; P3: irrigated) of the stony soil using the parameters that were obtained from the sheltered plot of the stony soil.
